# Supplementary material for: X-ray absorption spectroscopy by full-field X-ray microscopy of a thin graphite flake: Imaging and electronic structure via the carbon K-edge
Source: publisher site journal article supplement (doi:10.3762/bjnano.3.39), 2012-04-25
Supplement: Additional file 1 [file 2190-4286-3-39-S1.pdf]

## **Supporting Information**

for

### **X-ray absorption spectroscopy by full-field X-ray microscopy of a thin graphite flake: Imaging and electronic structure via the carbon K-edge.**

C. Bittencourt\*<sup>1</sup>, A. P. Hitchcock<sup>2</sup>, X. Ke<sup>1</sup>, G. Van Tendeloo<sup>1</sup>, C. P. Ewels<sup>3</sup> and P. Guttman<sup>4</sup>

Address: <sup>1</sup>Electron Microscopy for Materials Science (EMAT), University of Antwerp, B-2020 Antwerp, Belgium, <sup>2</sup>Chemistry & Chemical Biology, McMaster University, L8S4M1 Hamilton, ON, Canada, <sup>3</sup>Institut des Matériaux Jean Rouxel (IMN), Université de Nantes, CNRS, Nantes, France and <sup>4</sup>Helmholtz-Zentrum Berlin für Materialien und Energie GmbH, Institute for Soft Matter and Functional Materials, D-12489 Berlin, Germany

Email: Carla Bittencourt\* - carla.bittencourt@ua.ac.be

\* Corresponding author

### **Additional figures**

Figure S1a shows an electron microscopy image recorded on typical flakes studied in this work. We can see the morphology of a typical edge with a few layers in Figure S1b.

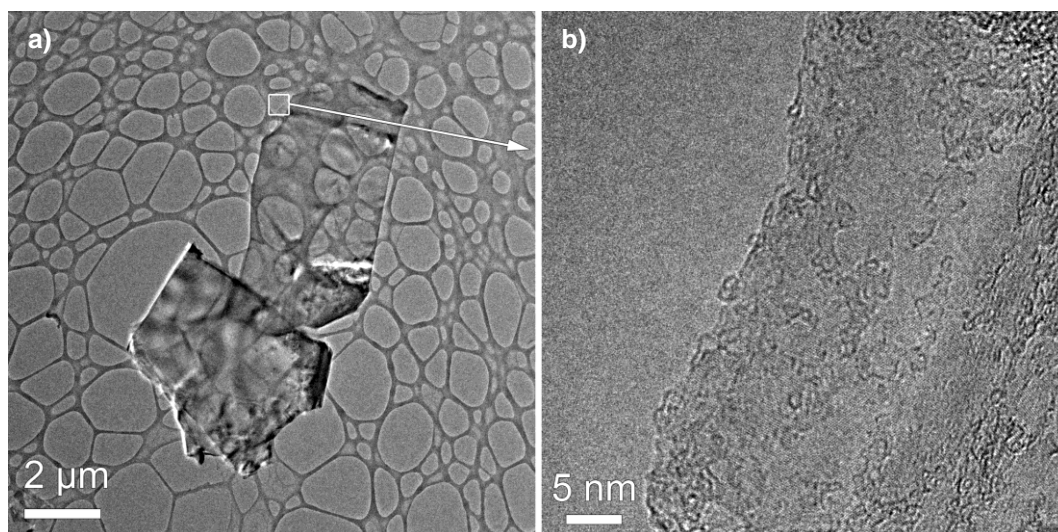

**Figure S1:** Typical flakes: Electron microscopy image at low (a) and high (b) resolution.

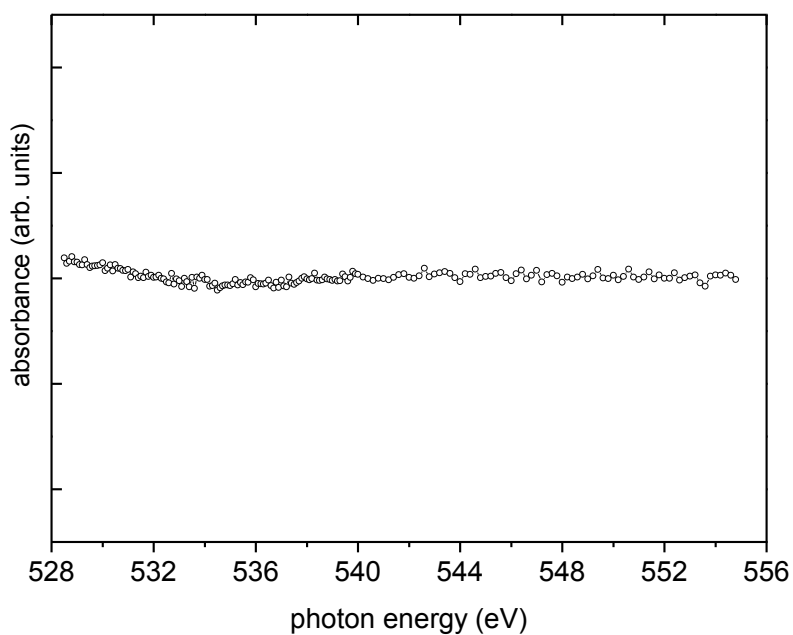

**Figure S2:** Oxygen K-edge spectrum

Figure S3 shows the schematic of the morphology of the studied flake. Differences in the contrast level in the X-ray image (see Figure 3) allow the determination of regions with different OD (optical density) and edges.

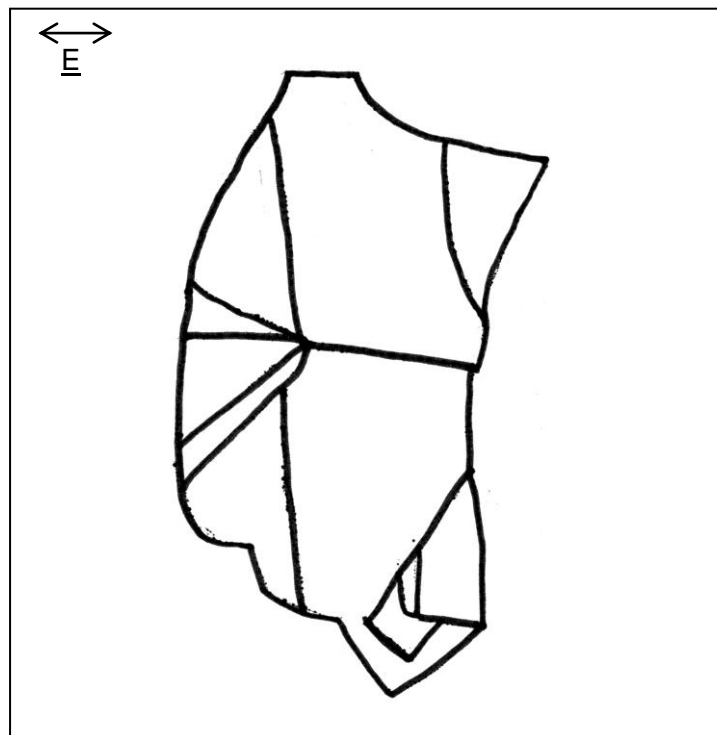

**Figure S3:** Schema of the morphology of the studied sample. The images in Figure 3 were used to determine the different edge locations.
